# Supplementary material for: Epigenetic silencing of miR-520c leads to induced S100A4 expression and its mediated colorectal cancer progression
Source: PubMed Central journal article supplement (PMC5400567; doi:10.18632/oncotarget.15499), 2017-02-18
Supplement: oncotarget-08-21081-s001.pdf [file oncotarget-08-21081-s001.pdf]

## Epigenetic silencing of miR-520c leads to induced S100A4 expression and its mediated colorectal cancer progression

### Supplementary Materials

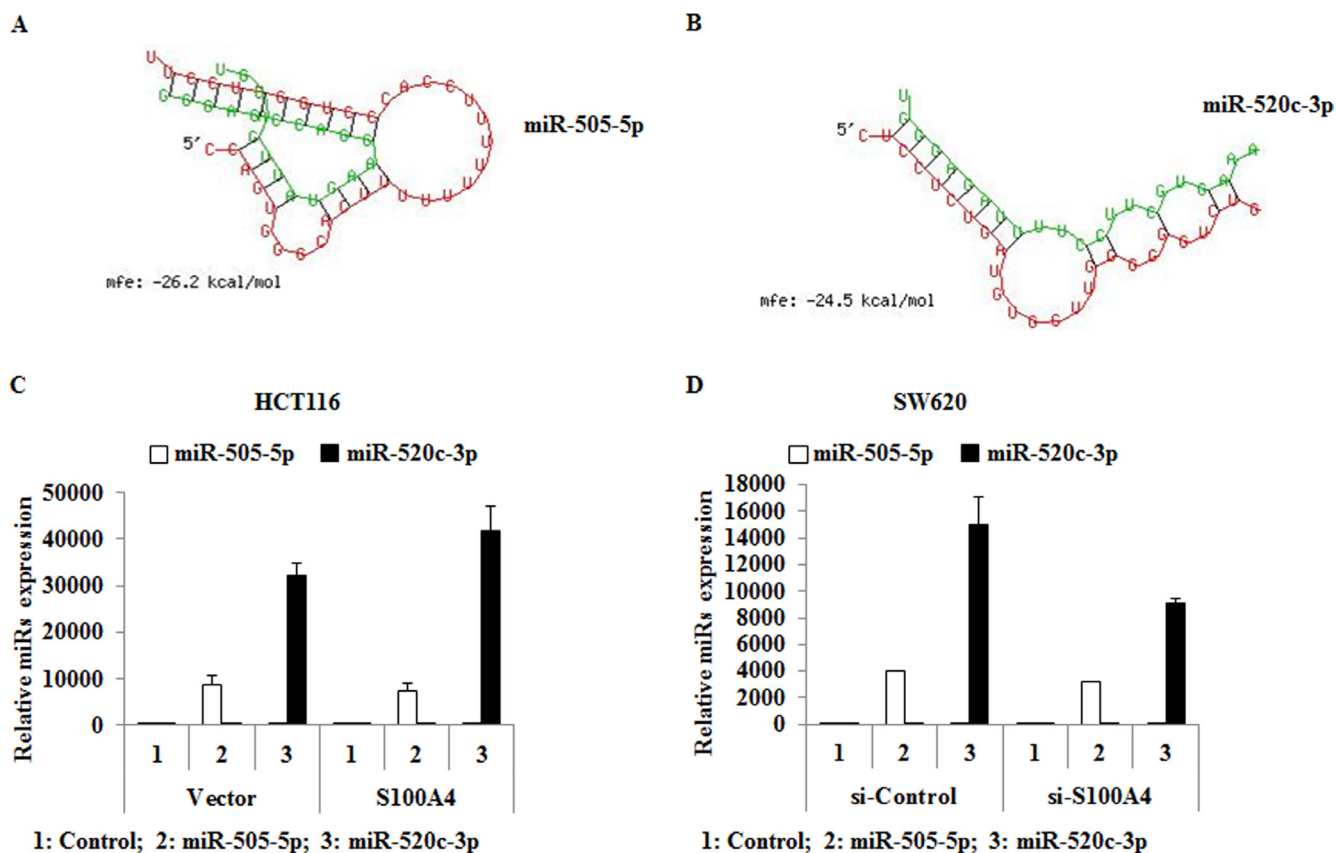

**Supplementary Figure 1: Secondary structure prediction (RNAhybrid) of the binding between the seed sequences of miR-505-5p and miR-520c-3p within the S100A4-3'-UTR and ectopic overexpression of miR-505-5p and miR-520c-3p.** (A, B) The S100A4-3'-UTR contains seed sequences for miR-505-5p (green-highlighted sequence) at position 77 to 85 nt and miR-520c-3p (green-highlighted sequence) position 59 to 65 nt and showed a strong hybridization energy  $\Delta G$  of -26.2 kcal/mol and -24.5 kcal/mol, respectively. (C, D) HCT116 or SW620 cells were transfected with control-miR, miR-505-5p, miR-520c-3p along with either vector-control or -S100A4 expression (HCT116) or si-Control and si-S100A4 (SW620). Transfection efficiency of miRs was measured using qRT-PCR, whereas RNUB6 served as internal control.

## S100A4

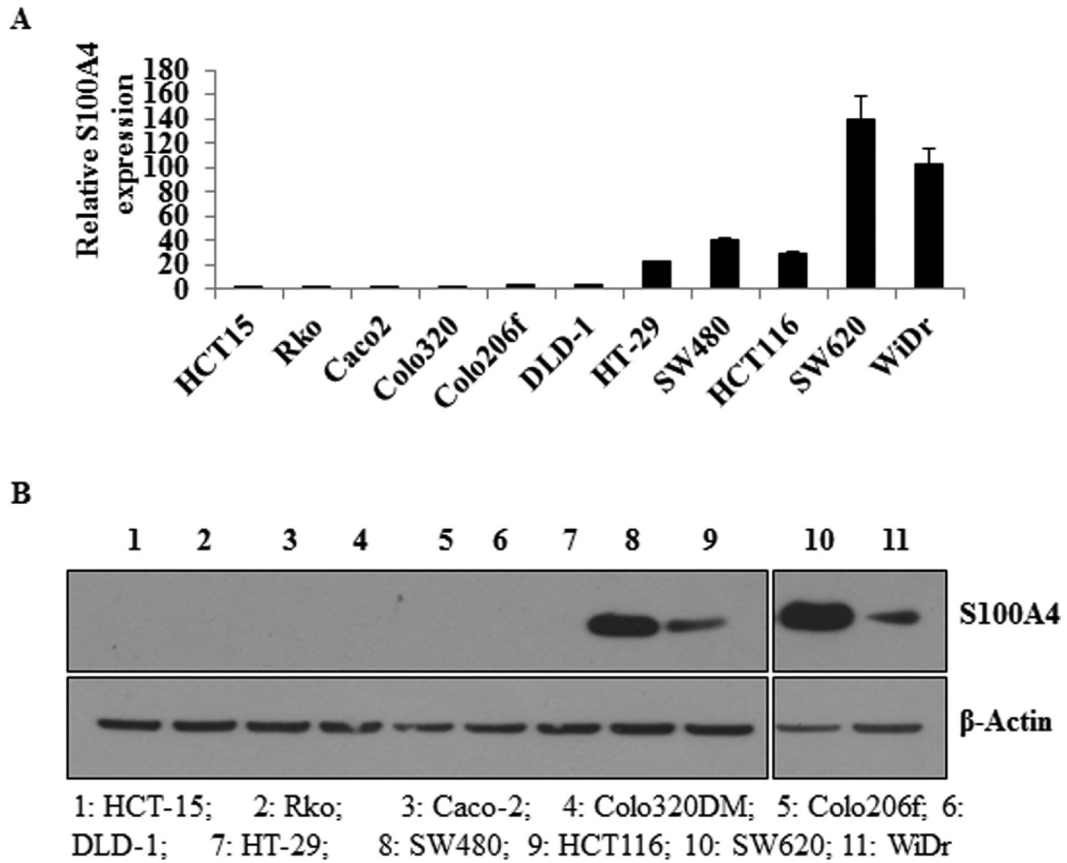

**Supplementary Figure 2: S100A4 endogenous mRNA expression and protein amount in CRC cell lines.** (A) S100A4 expression in a panel of CRC cell lines was analyzed by qRT-PCR, whereas RPII served as internal control. (B) S100A4 protein amounts were screened in the same panel of CRC cell lines, whereas  $\beta$ -actin served as internal control (Samples were analyzed using two gels, whereas sample preparation, gel electrophoresis, blotting and development were simultaneously performed).

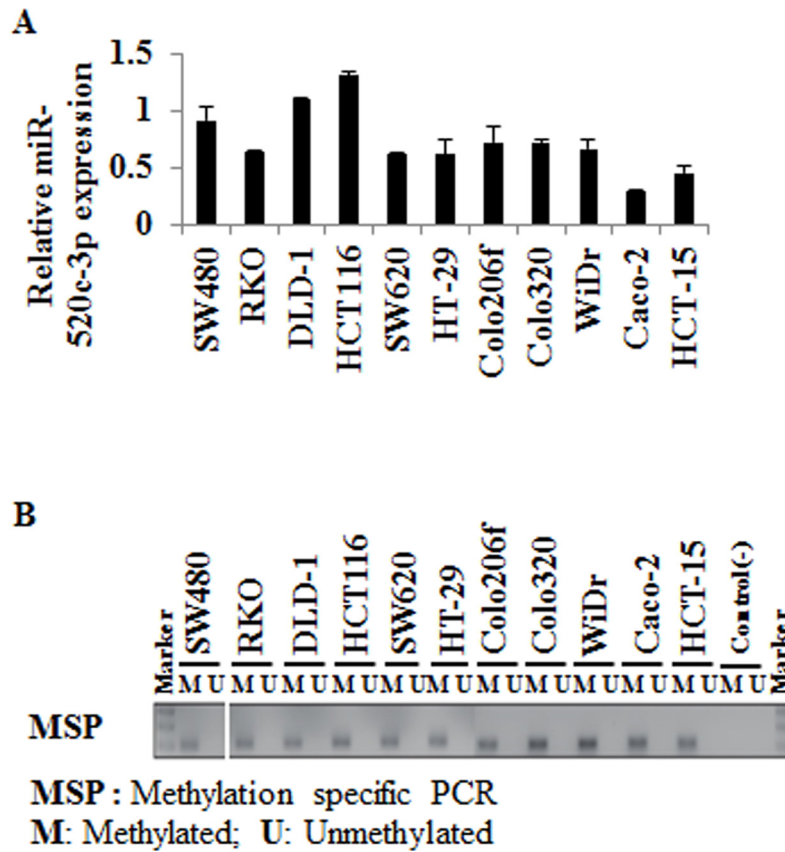

**Supplementary Figure 3: miR-520c expression and methylation status in a panel of CRC cell lines.** (A) Endogenous miR-520c-3p expression was quantified using qRT-PCR. RNUB6 served as internal control. (B) Results of the methylation-specific PCR of the CRC cell lines were analyzed using gel electrophoresis of the PCR products.

A

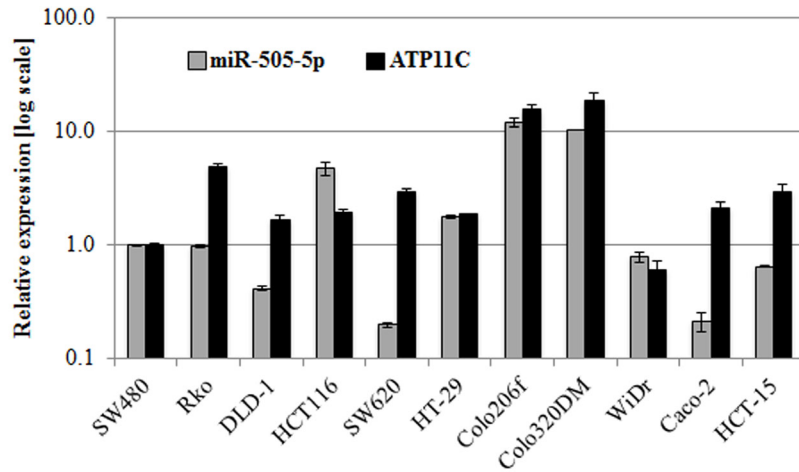

B

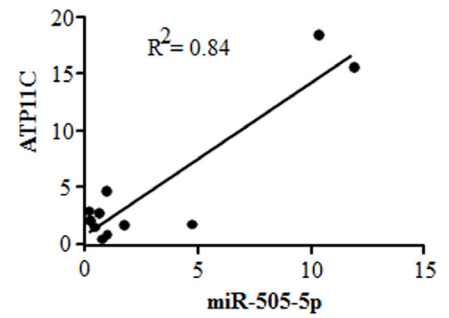

C

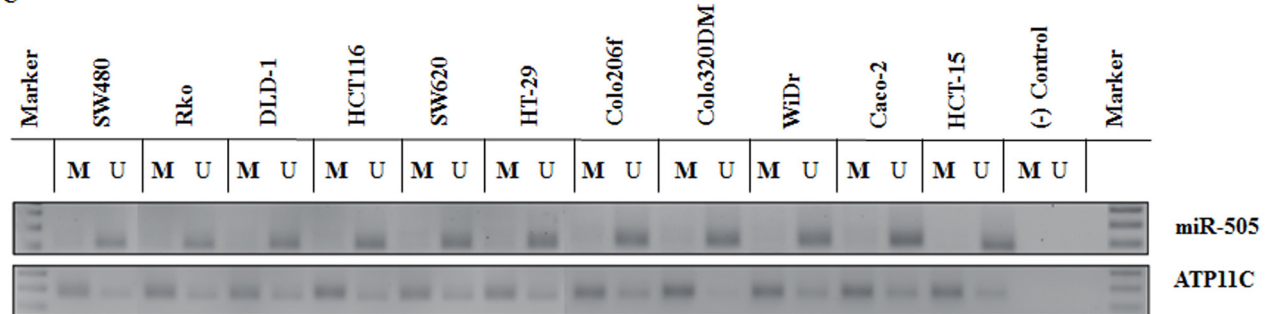

**Supplementary Figure 4: miR-505-5p and its host gene ATP11C expression, and methylation status in a panel of CRC cell lines.** (A, B) Relative miR-505-5p and ATP11C expression levels in a panel of CRC cell lines were analyzed by qRT-PCR, whereas RNUB6 and RPII served as internal controls. miR-505-5p and ATP11C expression levels positively correlated in CRC cell lines ( $R^2 = 0.84$ ). (C) PCR products of CRC cell lines obtained from methylation-specific PCR for the possible regulatory region of miR-505 and its host gene ATP11C were analyzed by agarose gel electrophoresis.

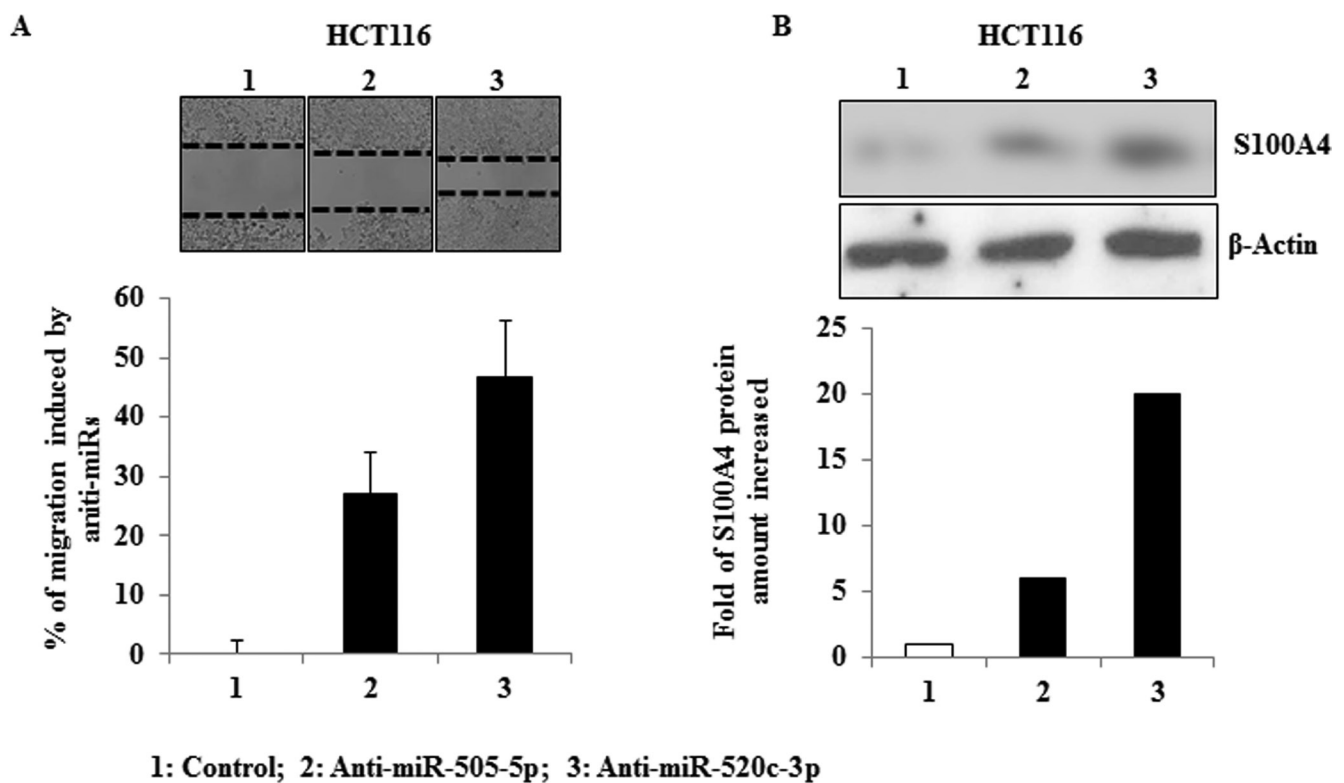

**Supplementary Figure 5: Inhibition of miR-520c-3p significantly induces wound healing and S100A4 protein expression in HCT116 cells.** (A) HCT116 cells were transfected with anti-miR-505-5p and anti-miR-520-3p. After 48 h cells were plated in wound healing culture plates (#80241, Ibidi, Germany) and incubated for 24 h to allow the cells to attach. The cell separating plastic covers were removed. After 24 h of incubation the wound was photographed under a brightfield microscope. Wound healing was measured comparative to control and the bar graph shows the relative migration (wound healing) induced by anti-miR-505-5p and anti-miR-520c-3p. (B) After 48 h, protein was isolated from anti-miR transfected cells and S100A4 protein expression was analyzed using Western blot (presented here is the shortest exposure to show the clear differences), whereas  $\beta$ -actin served as internal control. The bar graph shows the densitometric analysis of S100A4 protein in comparison to the control.

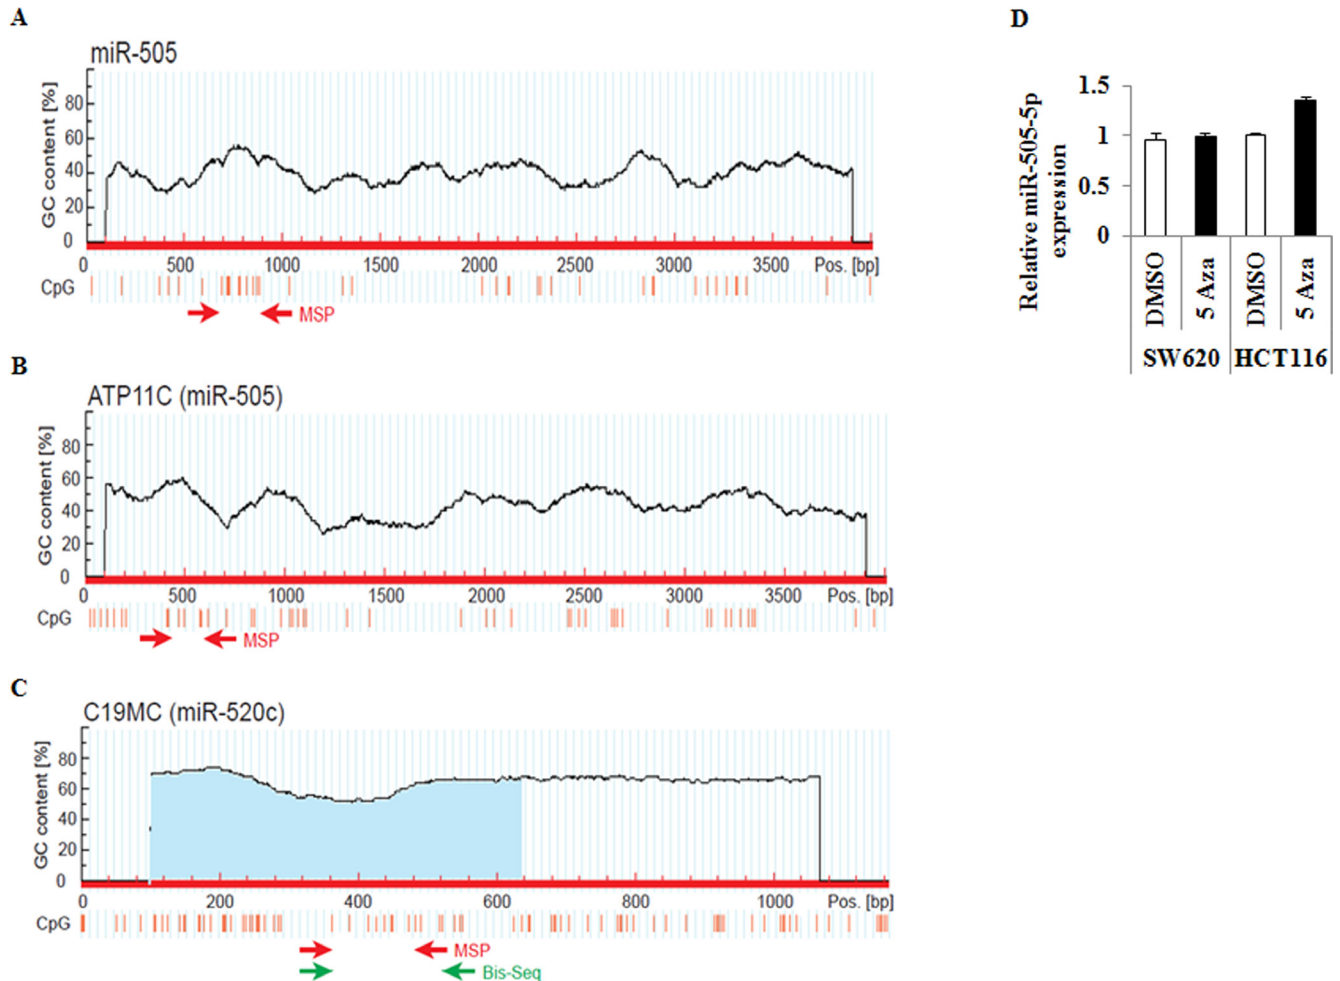

**Supplementary Figure 6: Diagrammatic representation of CpG-islands in the upstream regions of miR-520c, miR-505 and the promoter region of its host gene ATP11C.** (A–C) The Methprimer tool was used to predict CpG islands in upstream regions of miR-505, ATP11C and miR-520c. For miR-520c a reported region was analyzed, whereas for miR-505 and ATP11C the 4 kb upstream region was used for methylation analysis. Primer locations for methylation specific PCR and bisulfite sequencing are represented by arrows in red (MSP) and green (Bis-Seq). (D) The expression of miR-505-5p and ATP11C after 5-Aza (2  $\mu$ M) treatment for 3 days was analyzed in SW620 and HCT116 cells using qRT-PCR.

**Supplementary Table 1: Oligos used for S100A4-3'-UTR cloning**

| No | Oligo Name     | Sequence (5' --- 3')                 |
|----|----------------|--------------------------------------|
| 1  | S100A4_UTR_For | 5' CCCTCGAGCTTCCCAGATAAGCAGCCCA 3'   |
| 2  | S100A4_UTR_Rev | 5' CCGTCGACCTTCCAAGAATCTTTATTGAAC 3' |

**Supplementary Table 2: Oligos used to mutate miR-505 and miR-520c seed sequences at S100A4-3'-UTR**

| No | Oligo Name       | Sequence (5' --- 3')                                |
|----|------------------|-----------------------------------------------------|
| 1  | S100A4_m505_For  | AGCCAGGGTGGAAAAAAAAAATTCAGCCCACTGGCGACAGGGAG        |
| 2  | S100A4_m505_Rev  | CTCCCTGTCGCCAGTGGGCTGAATTTTTTTTCCACCCTGGCT          |
| 3  | S100A4_m520c_For | CAGCATCAAGCACGTGTCTGAAAAGGCCAGGGTG<br>GAAAAAAAAAAGT |
| 4  | S100A4_m520c_Rev | ACTTTTTTTTTTCCACCCTGGCCTTTTCAGACACGTGCTTGATGCTG     |

**Supplementary Table 3: Oligos used for measuring the Human microsatellite DNA (HMD) in mice liver tissue**

| No | Gene Name | Sequence (5' --- 3')       |
|----|-----------|----------------------------|
| 1  | HMD_F     | GGGATAATTTTCAGCTGACTAAACAG |
| 2  | HMD_R     | AAACGTCCACTTGCAGATTCTAG    |

**Supplementary Table 4: Patients information**

|                         |                     | Total | Percentage |
|-------------------------|---------------------|-------|------------|
| Sex                     | M                   | 36    | 61%        |
|                         | F                   | 23    | 39%        |
| Age median (min to max) | 63.0 (37.9 to 87.8) |       |            |
| UICC (7th Edition)      | I                   | 17    | 29%        |
|                         | II                  | 22    | 37%        |
|                         | III                 | 20    | 34%        |
| pT                      | 1                   | 6     | 10%        |
|                         | 2                   | 16    | 27%        |
|                         | 3                   | 27    | 46%        |
|                         | 4                   | 10    | 17%        |
| pN                      | 0                   | 39    | 66%        |
|                         | 1                   | 14    | 24%        |
|                         | 2                   | 6     | 10%        |
| Metachronous metastases | no                  | 35    | 59%        |
|                         | yes                 | 24    | 41%        |

Clinico-pathological features of the 59 CRC patients.

pT = Pathologic tumor classification. pN = Pathologic lymph node status.

**Supplementary Table 5: Oligos used for S100A4 and RPII screening by qRT-PCR**

| No | Gene Name  | Sequence (5' --- 3') |
|----|------------|----------------------|
| 1  | S100A4_For | TGTGATGGTGTCCACCTCC  |
| 2  | S100A4_Rev | CCTGTTGCTGTCCAAGTTGC |
| 3  | RPII_For   | GCACCACGTCCAATGACAT  |
| 4  | RPII_Rev   | GTGCGGCTGCTTCCATAA   |

**Supplementary Table 6: Oligos used for methylation-specific PCR (MSP) of miR-505 and miR-520c**

| No | Gene Name    | Sequence (5' --- 3')       |
|----|--------------|----------------------------|
| 1  | miR-505_M_F  | ATTTAGGTTGGAGTGTAATGGTACG  |
| 2  | miR-505_M_R  | TTAAAAAACCGAAATAAAAAAATCG  |
| 3  | miR-505_U_F  | TTTAGGTTGGAGTGTAATGGTATGA  |
| 4  | miR-505_U_R  | AAAAAACCAAAATAAAAAAATCACC  |
| 5  | miR-520c_M_F | CGGTAAAATTTTGAATTTTTTTGTC  |
| 6  | miR-520c_M_R | AAAATACATACTAACCTACCGCGTT  |
| 7  | miR-520c_U_R | TGGTAAAATTTTGAATTTTTTTGTTG |
| 8  | miR-520c_U_R | AAAATACATACTAACCTACCACATT  |

M: Methylated; U: Unmethylated.

**Supplementary Table 7: Oligos used for Bisulfite sequencing and COBRA analysis of miR-520c**

| No | Gene Name     | Sequence (5' --- 3')       |
|----|---------------|----------------------------|
| 1  | miR-505_Bis_F | GGTAAAATTTTGAATTTTTTTGT    |
| 2  | miR-505_Bis_R | AAAAAACCTATTAATACTAAAAACCC |
